# Supplementary material
Source: PubMed Central journal article supplement (PMC6030700)
Supplement: EMBR-19-e45471-s001.pdf [file EMBR-19-e45471-s001.pdf]

## Appendix for

### **Map7/7D1 and Dvl form a feedback loop that facilitates microtubule remodeling and Wnt5a signaling.**

Koji Kikuchi<sup>1\*</sup>, Akira Nakamura<sup>2, 3</sup>, Masaki Arata<sup>4</sup>, Dongbo Shi<sup>5</sup>, Mami Nakagawa<sup>5</sup>, Tsubasa Tanaka<sup>2, 3</sup>, Tadashi Uemura<sup>4</sup>, Toshihiko Fujimori<sup>5</sup>, Akira Kikuchi<sup>6</sup>, Akiyoshi Uezu<sup>1</sup>, Yasuhisa Sakamoto<sup>1</sup>, and Hiroyuki Nakanishi<sup>1\*</sup>

#### **Table of content**

|                                |                                                                                                                           |              |
|--------------------------------|---------------------------------------------------------------------------------------------------------------------------|--------------|
| <b>Appendix Figure S1.</b>     | Expression levels of candidate genes in HeLa cells.                                                                       | <b>3</b>     |
| <b>Appendix Figure S2.</b>     | siRNA-based screen in HeLa cells to discover MT-binding protein(s) potentially involved in the Wnt/PCP signaling pathway. | <b>4</b>     |
| <b>Appendix Figure S3.</b>     | Map7 and its paralog, Map7D1 belong to the MAP7 family.                                                                   | <b>5</b>     |
| <b>Appendix Figure S4.</b>     | Generation of Map7-EGFP knock-in HeLa cells.                                                                              | <b>6</b>     |
| <b>Appendix Figure S5.</b>     | Phenotypes of Map7/7D1-depleted HeLa cells.                                                                               | <b>7</b>     |
| <b>Appendix Figure S6.</b>     | Specific complex formation between Map7/7D1 and Dvl.                                                                      | <b>8</b>     |
| <b>Appendix Figure S7.</b>     | Generation of Dvl2-EGFP knock-in HeLa cells.                                                                              | <b>9</b>     |
| <b>Appendix Figure S8.</b>     | Wnt5a signaling and the Kinesin-1 member Kif5b promote directional Map7 movement toward the MT plus-end.                  | <b>10</b>    |
| <b>Appendix Figure S9.</b>     | Generation of <i>Ens::EGFP</i> knock-in fly strains.                                                                      | <b>11</b>    |
| <b>Appendix Figure S10.</b>    | Generation of <i>ens</i> null mutants.                                                                                    | <b>12</b>    |
| <b>Appendix Figure legends</b> |                                                                                                                           | <b>13-18</b> |
| <b>Appendix Table S1.</b>      | Primary antibodies used in this study.                                                                                    | <b>19</b>    |
| <b>Appendix Table S2.</b>      | siRNAs used in this study except for the siRNA-based screen.                                                              | <b>20</b>    |

|                            |                                                                |              |
|----------------------------|----------------------------------------------------------------|--------------|
| <b>Appendix Table S3.</b>  | sgRNA sequences used in this study.                            | <b>20</b>    |
| <b>Appendix Table S4.</b>  | Primer sequences for RT-qPCR used in this study.               | <b>21-24</b> |
| <b>Appendix Table S5.</b>  | siRNA sequences for the siRNA-based screen used in this study. | <b>25-26</b> |
| <b>Appendix Table S6.</b>  | Fly strains used in this study.                                | <b>27</b>    |
| <b>Appendix References</b> |                                                                | <b>28</b>    |

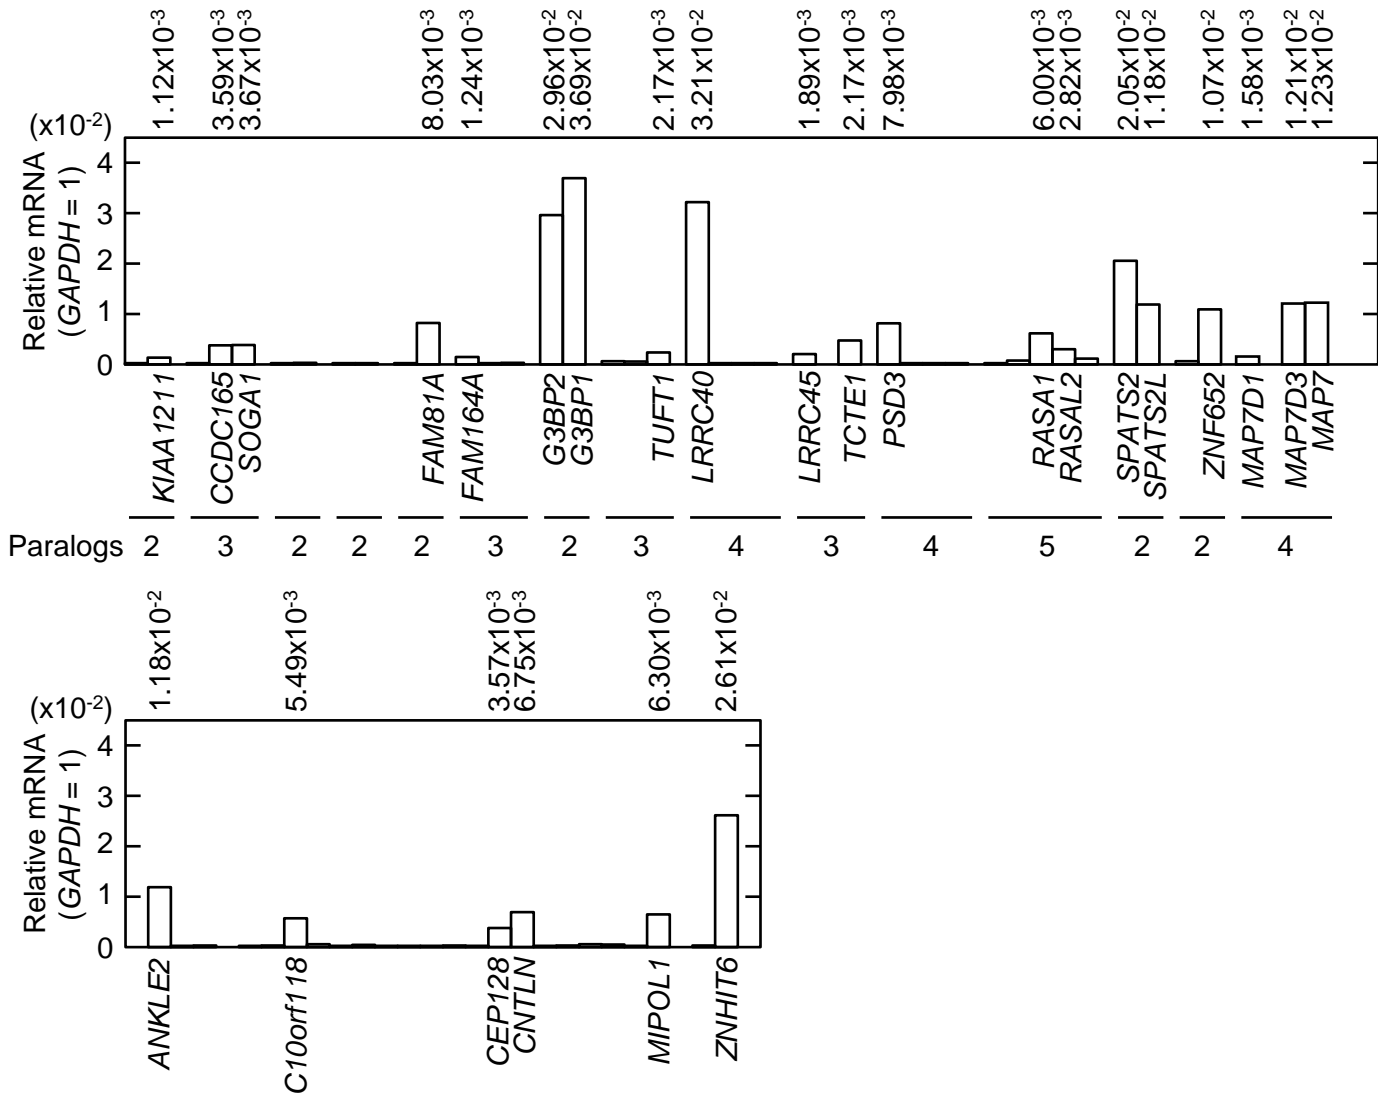

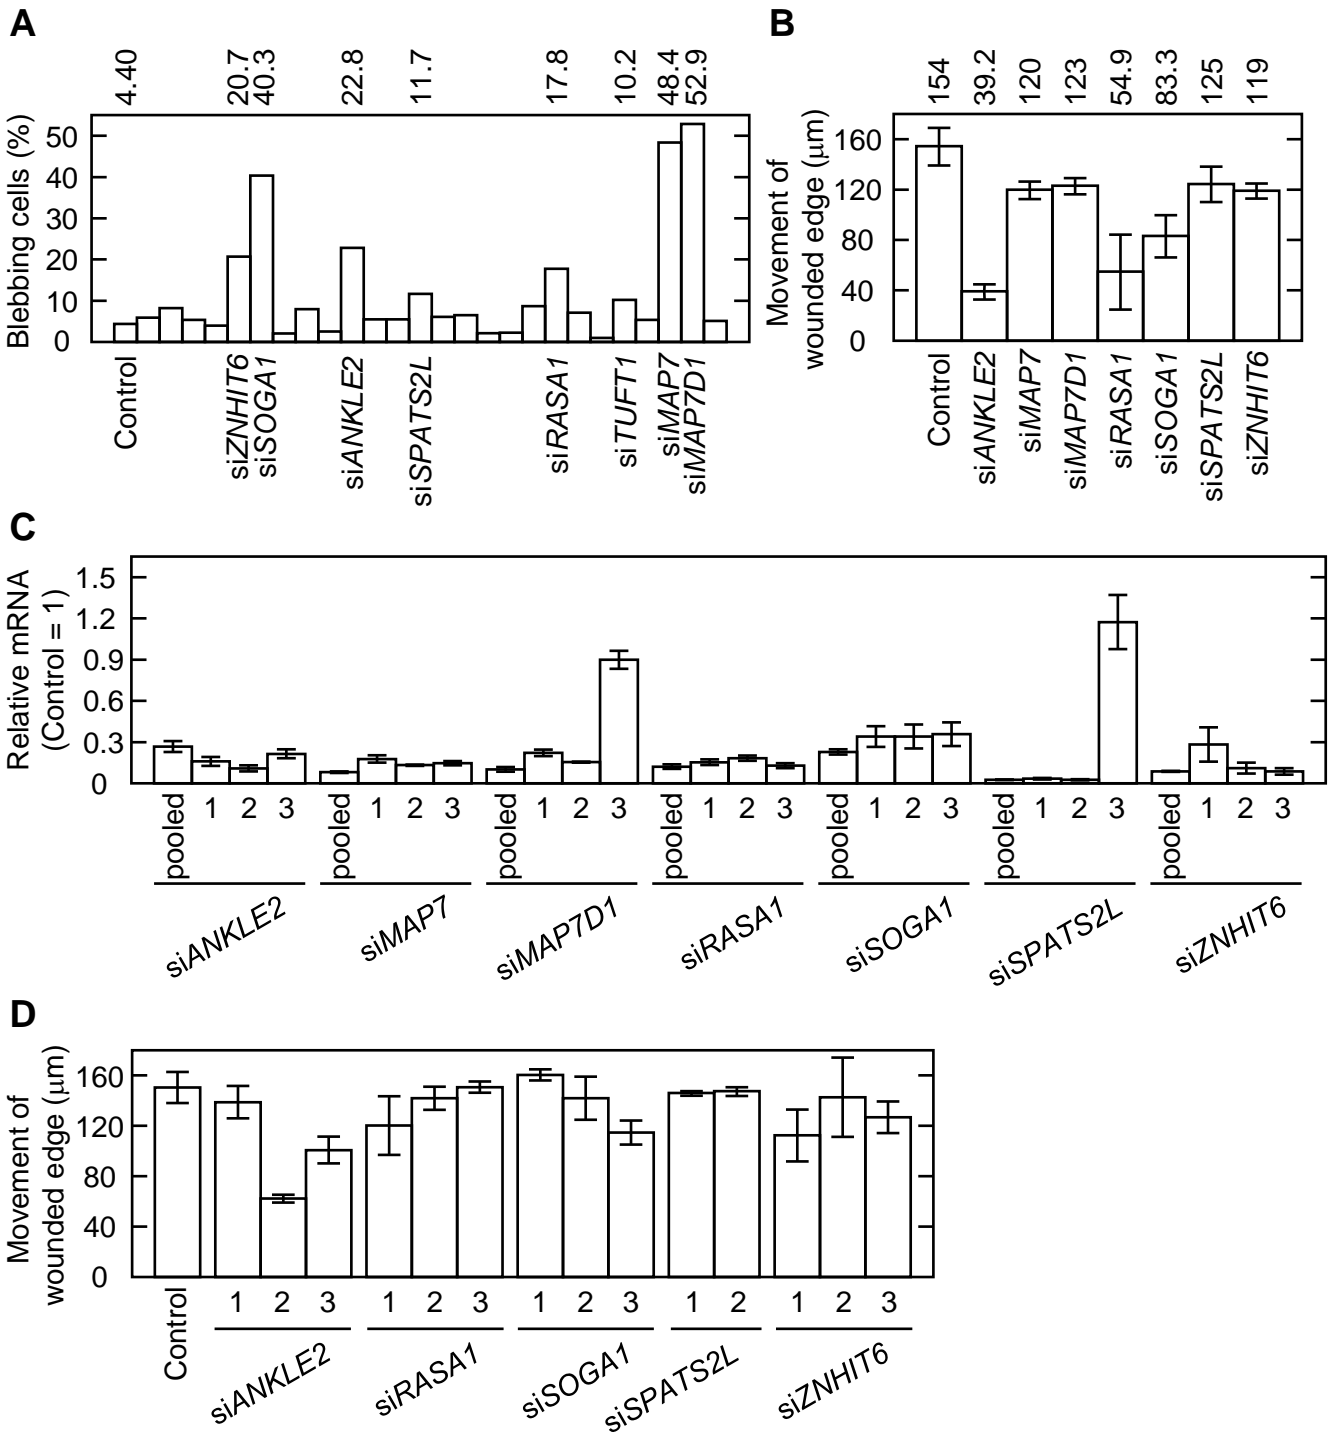

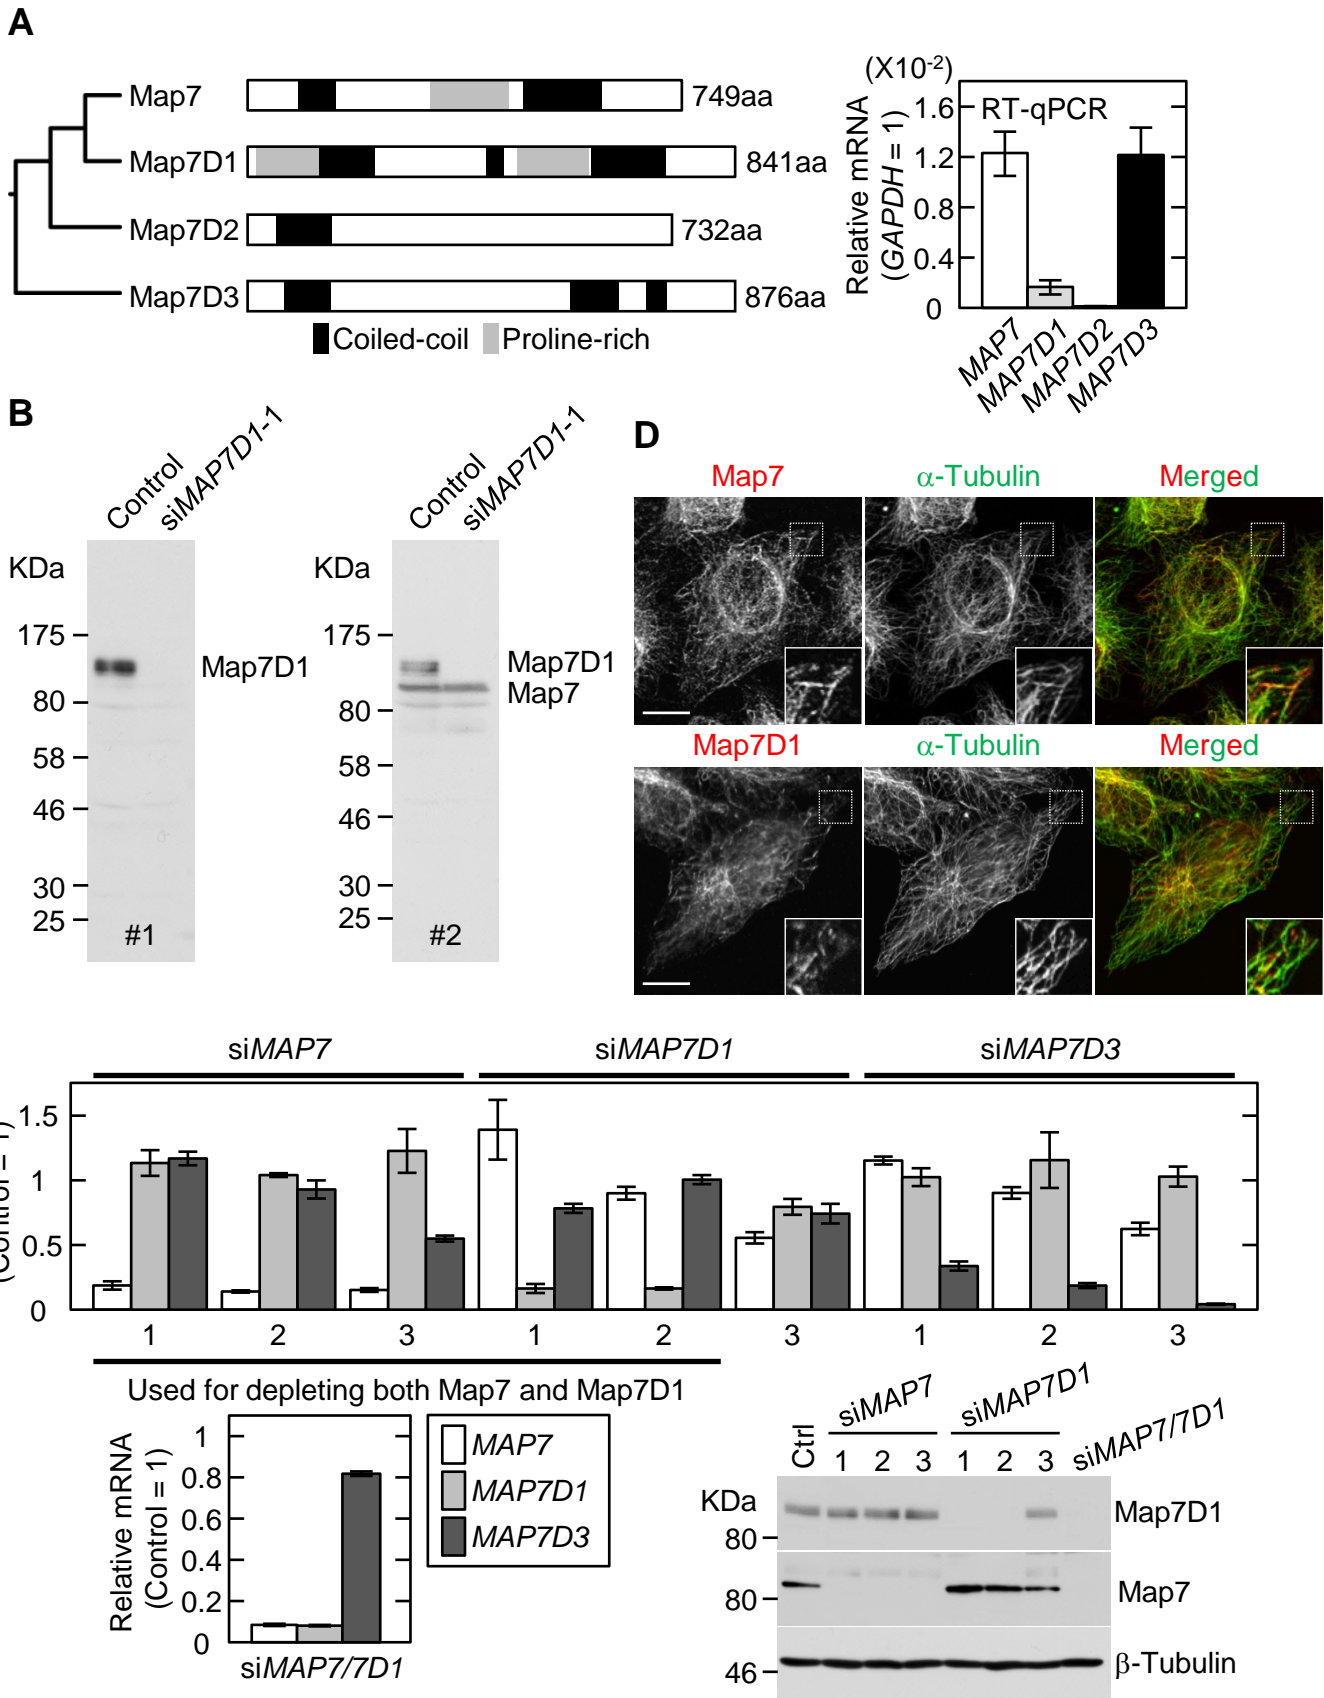

**A**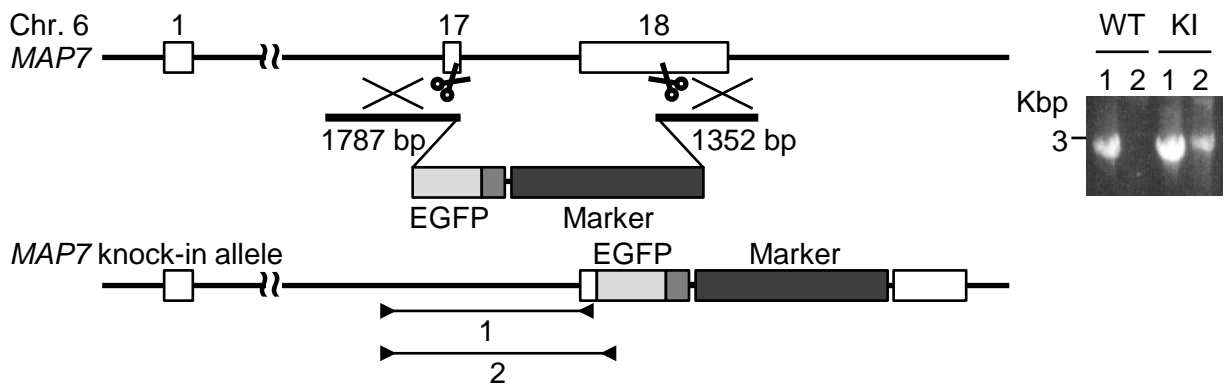**B**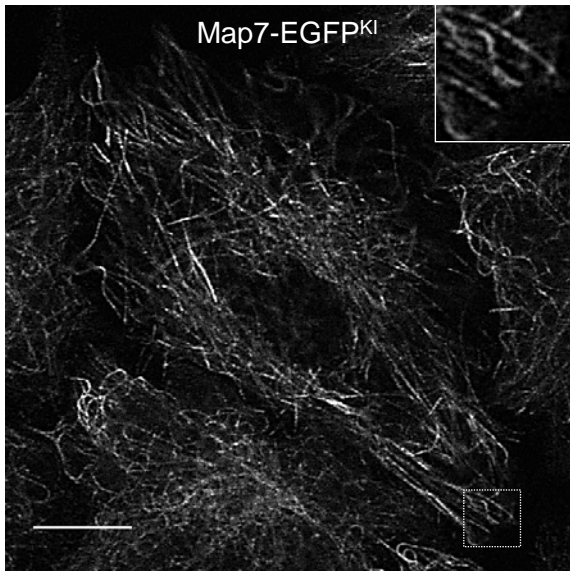

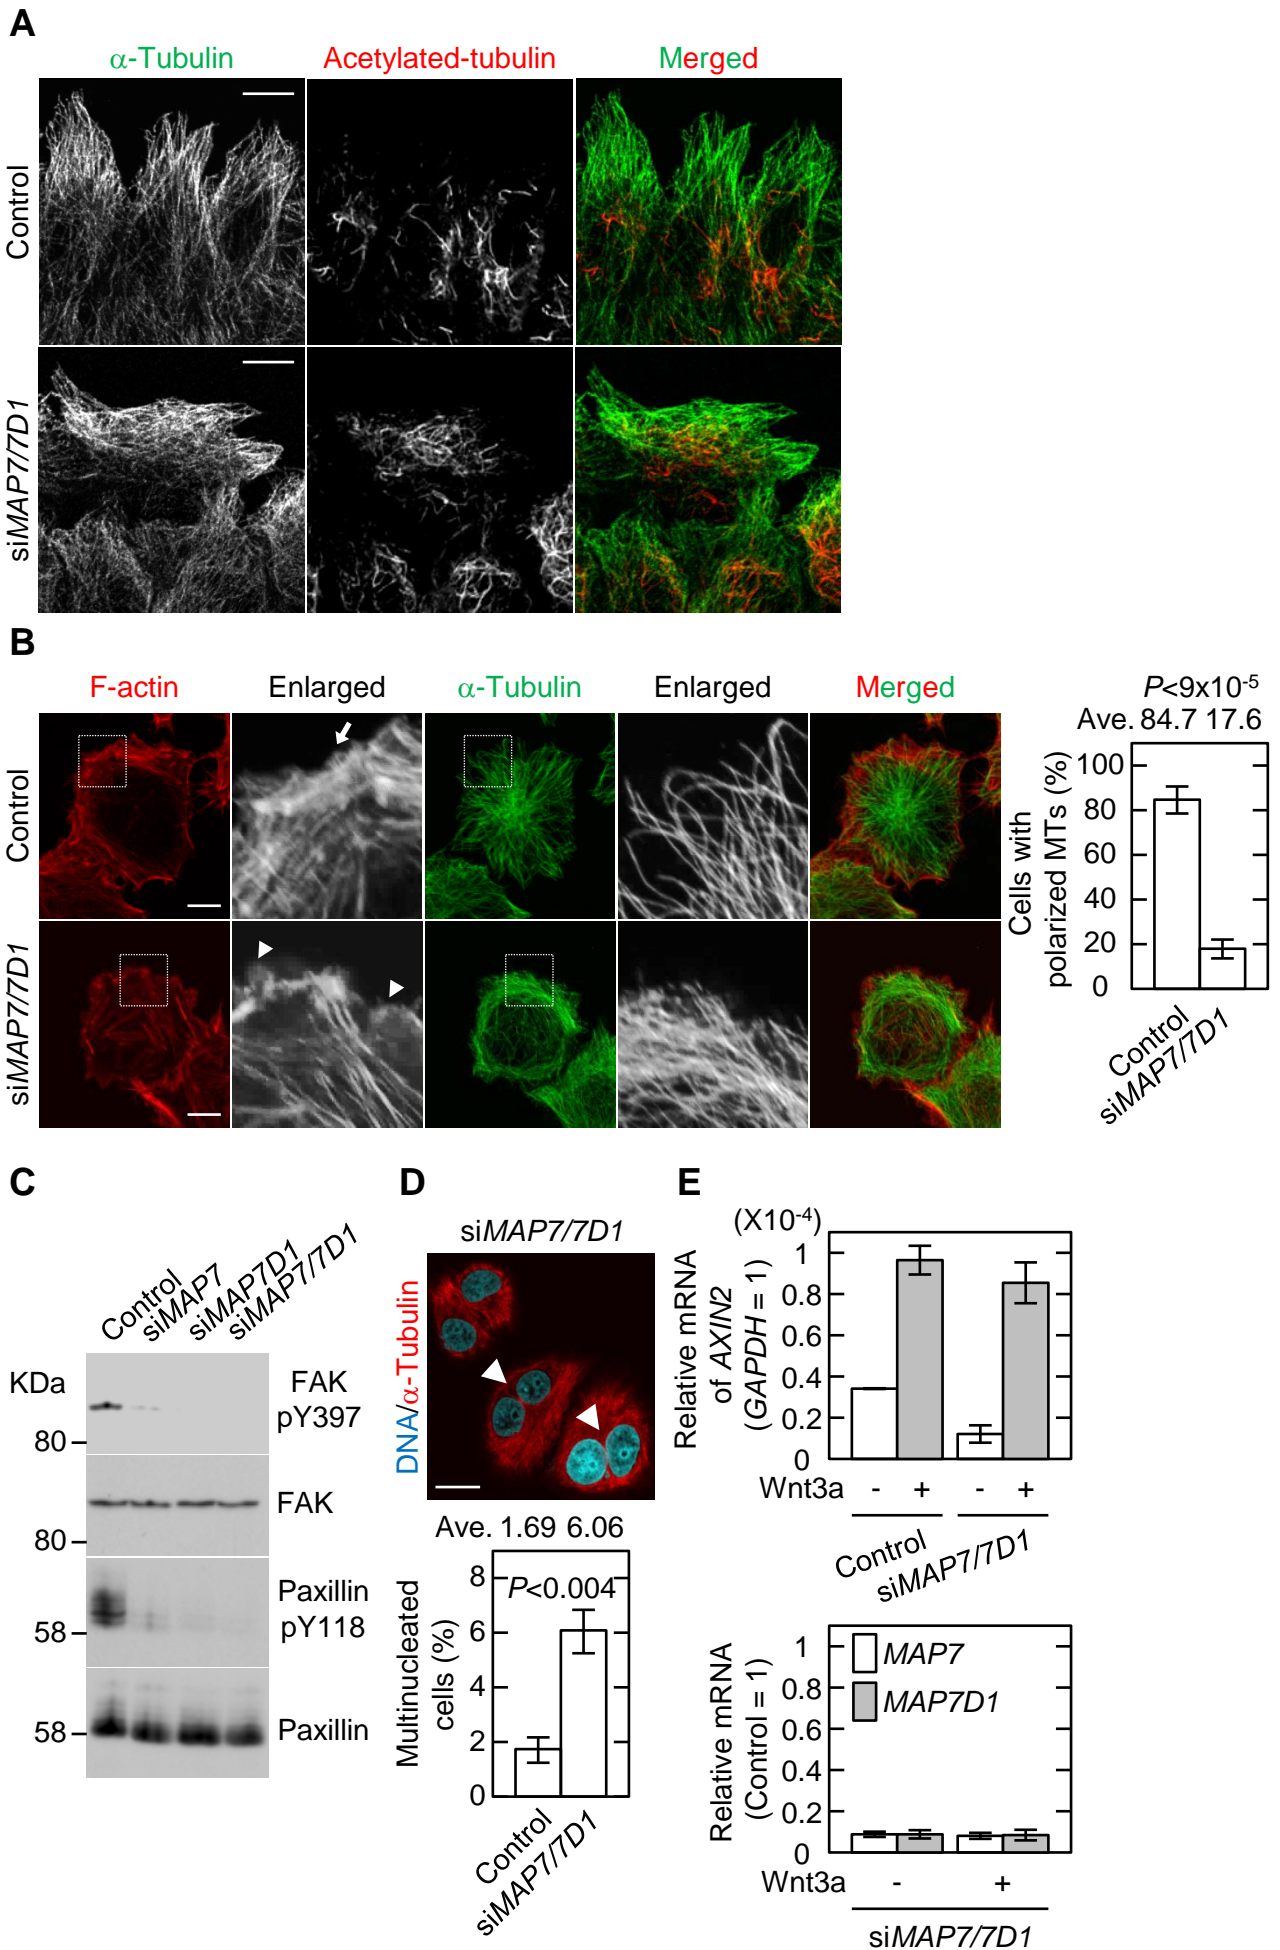

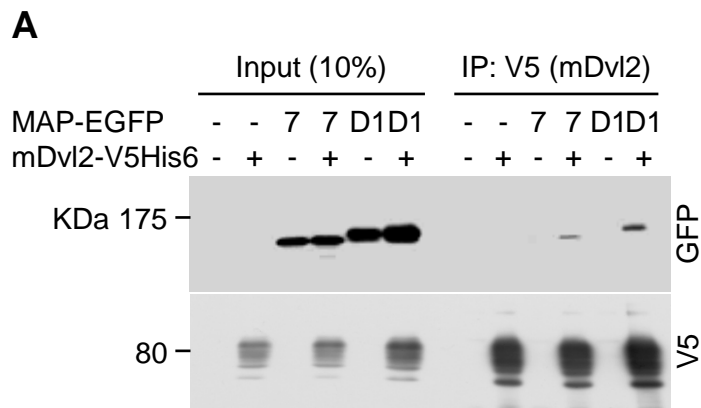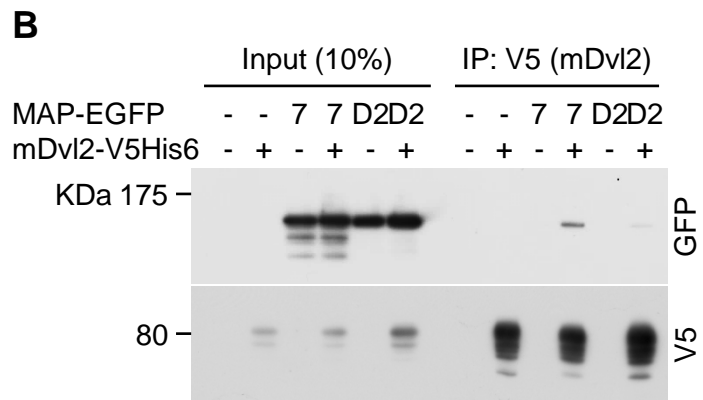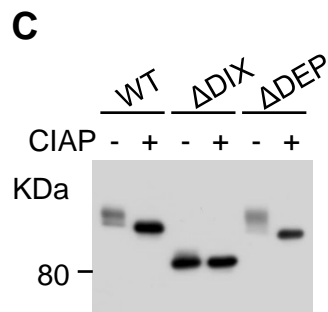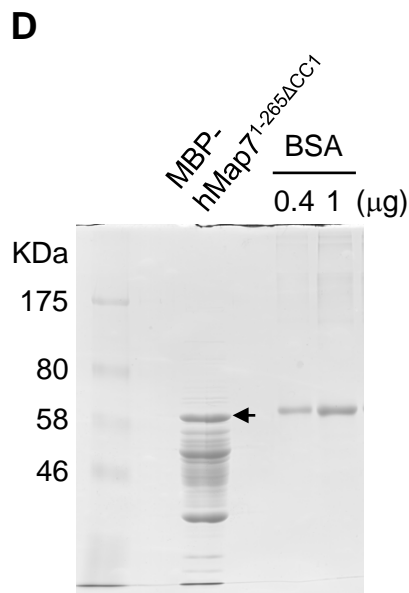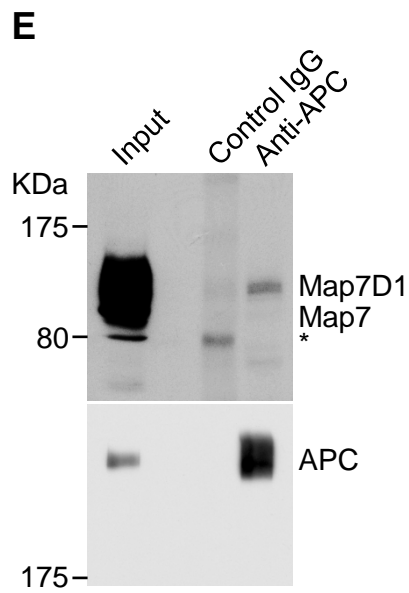



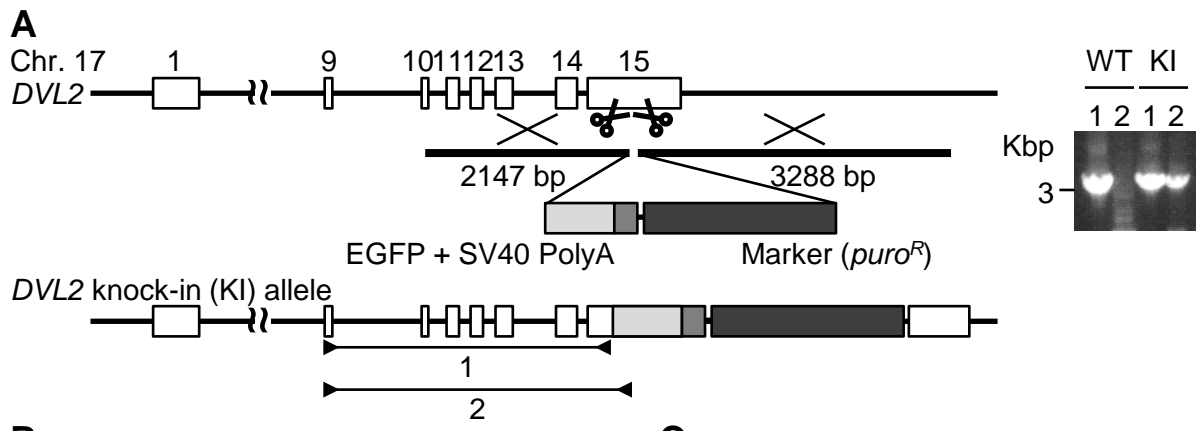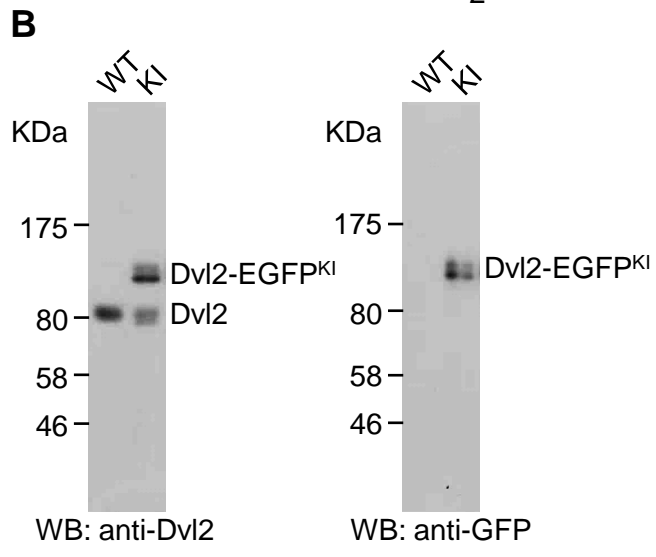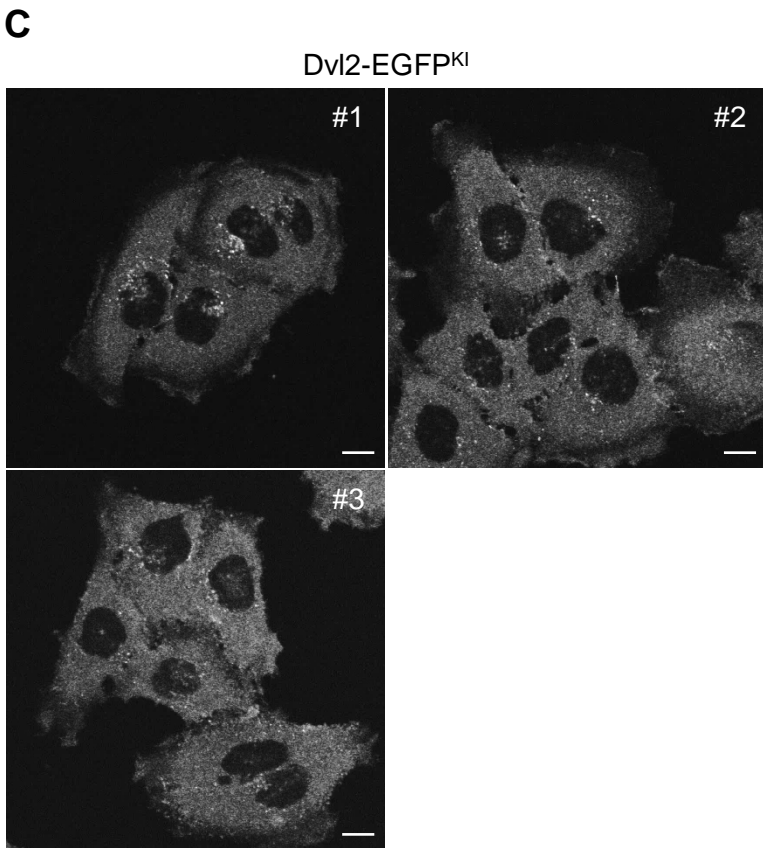

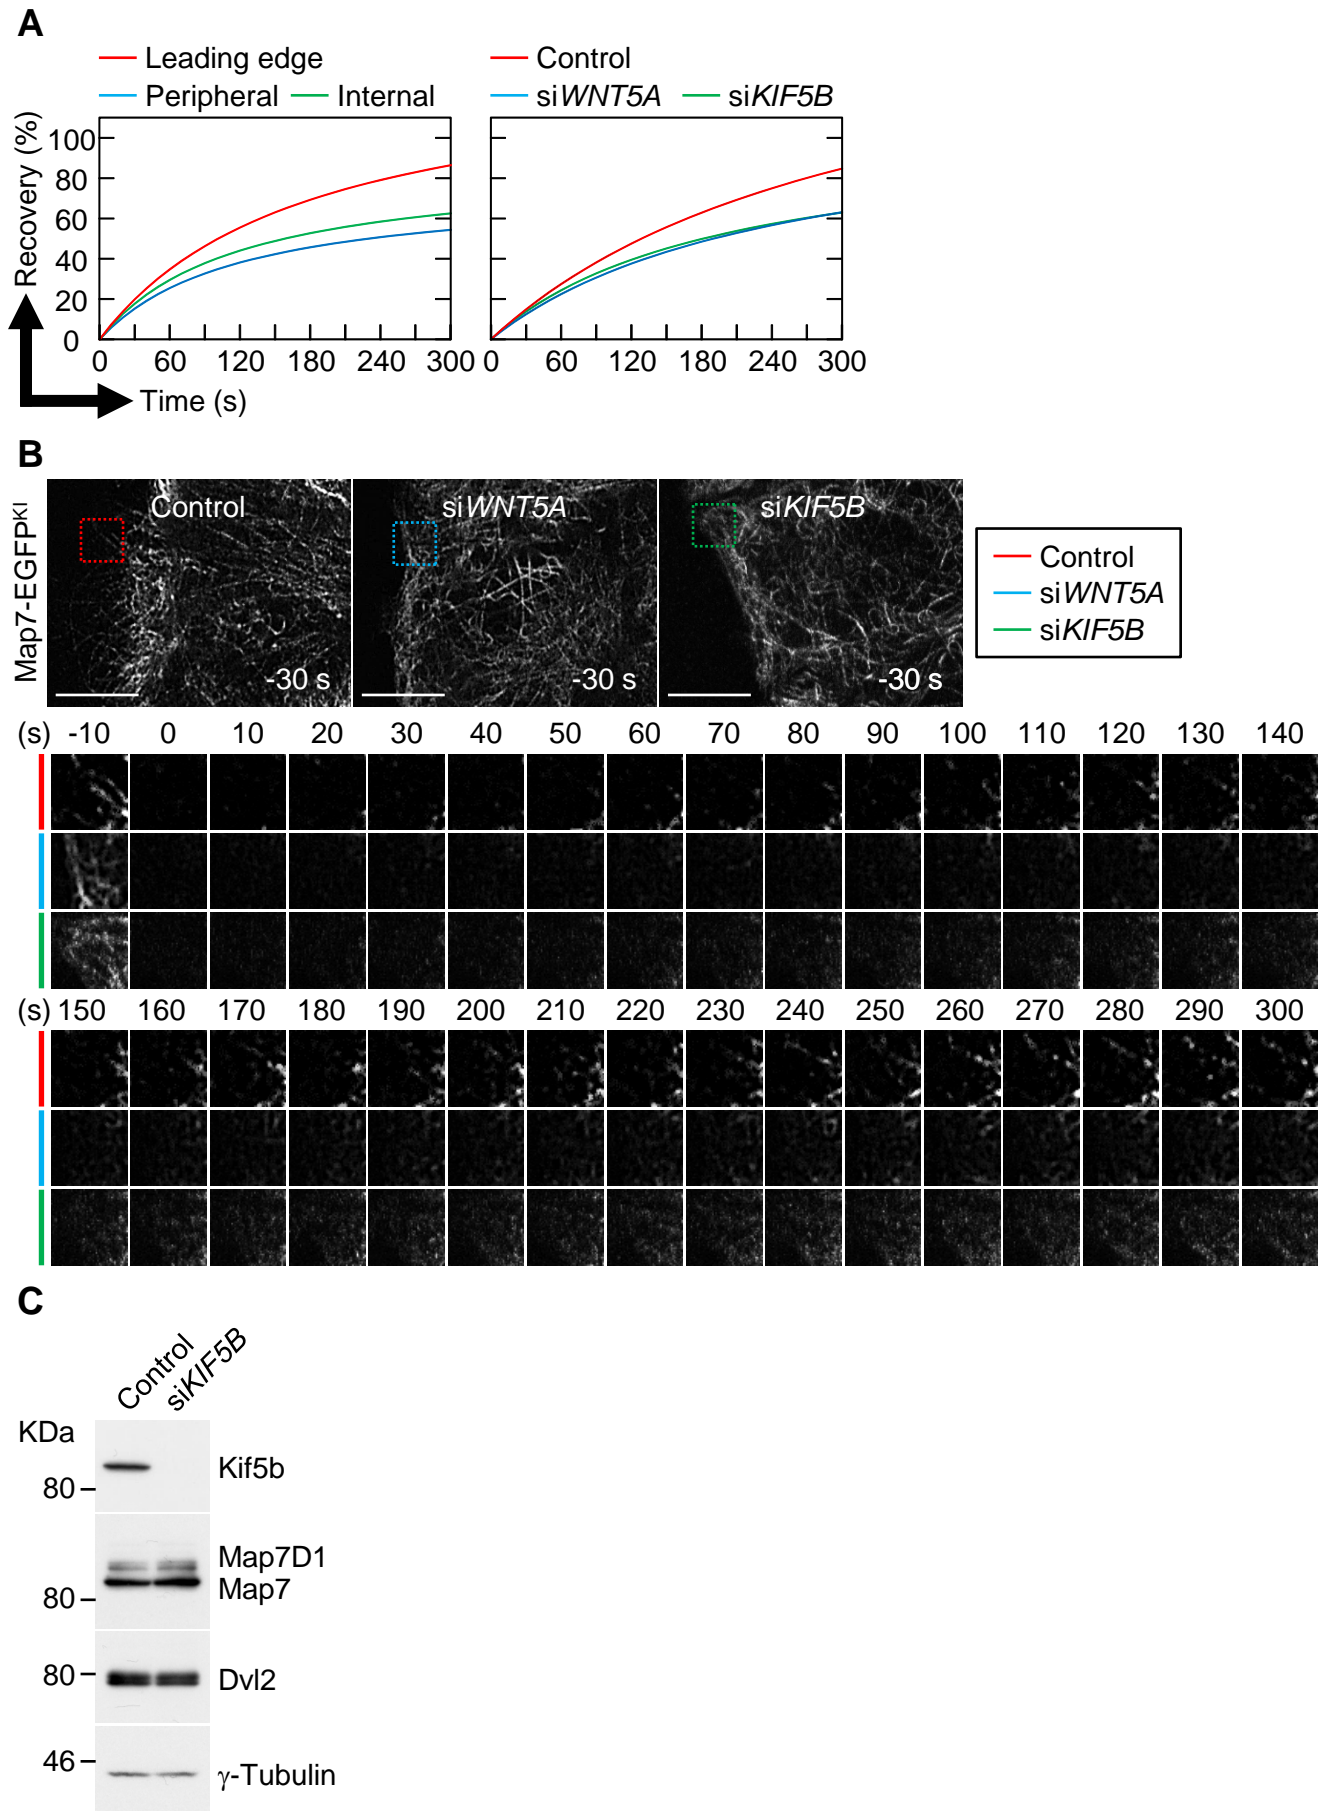

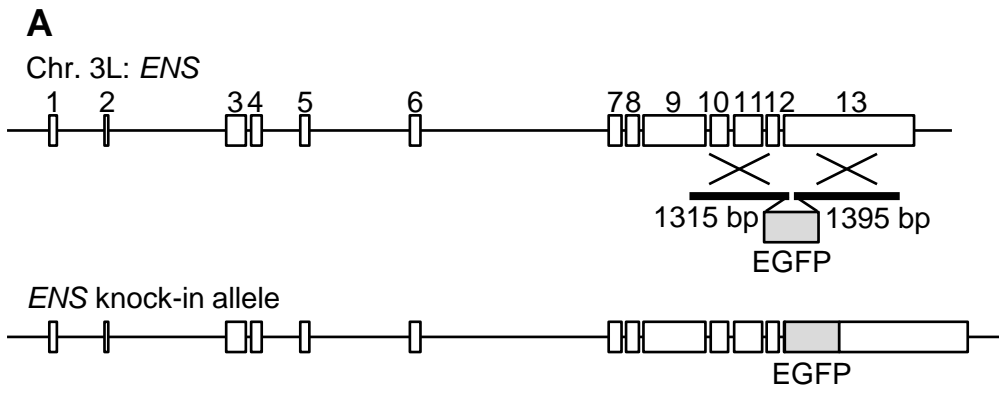**B**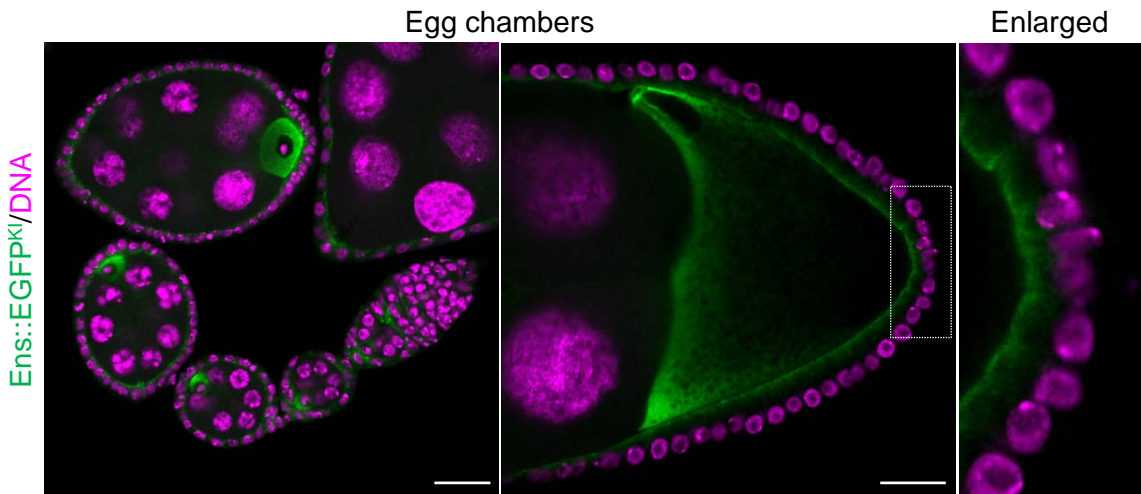**C**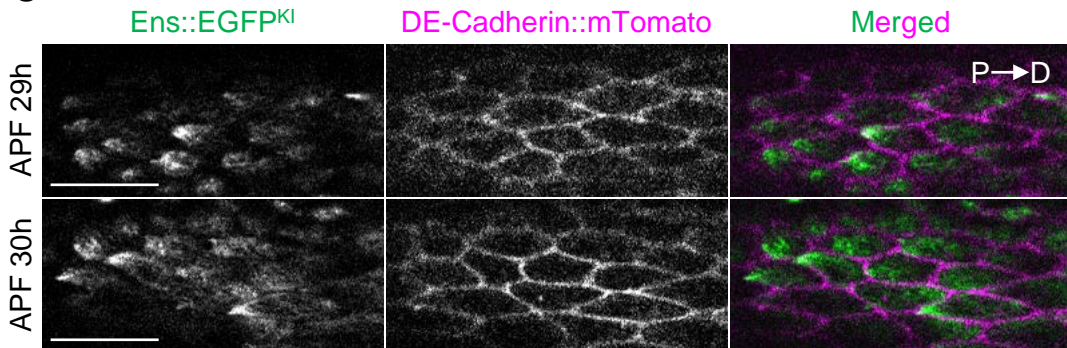

**A**

| Female: <i>Df(3L)ens<sup>Δ3277</sup></i> |                           | Hemizygous | Heterozygous | Mendelian inheritance | Lethality (%) |
|------------------------------------------|---------------------------|------------|--------------|-----------------------|---------------|
| Male:                                    | <i>ens<sup>KO36</sup></i> | 82         | 703          | 351.5                 | 76.7          |
|                                          | <i>ens<sup>KO39</sup></i> | 43         | 682          | 341                   | 87.4          |
|                                          | <i>ens<sup>ΔC</sup></i>   | 46         | 412          | 206                   | 77.7          |

  

|                           | Homozygous | Heterozygous | Mendelian inheritance | Lethality (%) |
|---------------------------|------------|--------------|-----------------------|---------------|
| <i>ens<sup>KO36</sup></i> | 2          | 1091         | 545.5                 | 99.6          |
| <i>ens<sup>KO39</sup></i> | 0          | 559          | 144.5                 | 100           |
| <i>ens<sup>ΔC</sup></i>   | 98         | 271          | 135.5                 | 27.7          |

  

| Female                    | Male                      | Trans-heterozygous | Heterozygous | Mendelian inheritance | Lethality (%) |
|---------------------------|---------------------------|--------------------|--------------|-----------------------|---------------|
| <i>ens<sup>KO36</sup></i> | <i>ens<sup>KO39</sup></i> | 0                  | 501          | 250.5                 | 100           |
| <i>ens<sup>KO39</sup></i> | <i>ens<sup>KO36</sup></i> | 0                  | 562          | 281                   | 100           |

**B**

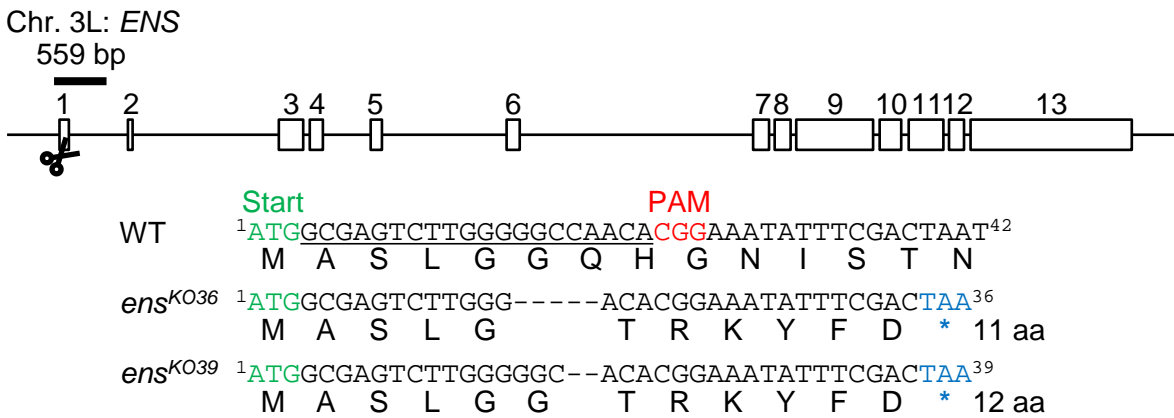

**C**

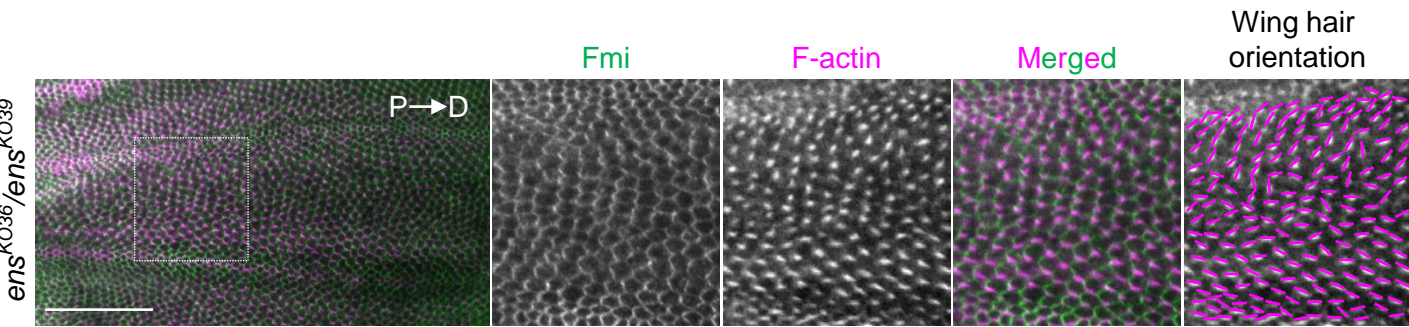

**D**

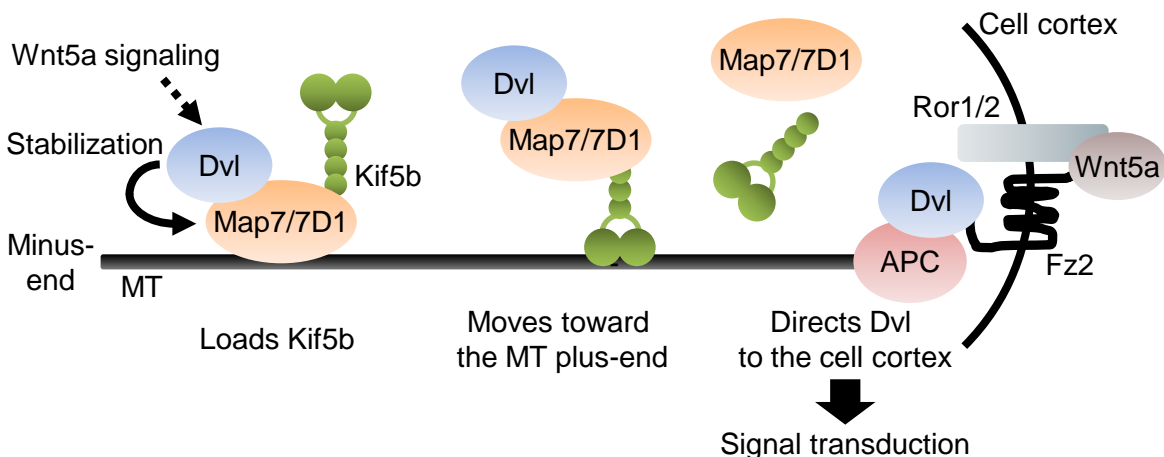

## Appendix Figure legends

### Appendix Figure S1. Expression levels of candidate genes in HeLa cells.

The expression levels of 69 genes for uncharacterized MT co-sedimented proteins and their paralogs were analyzed in HeLa cells by RT-qPCR. The relative mRNA level of each gene was normalized to the *GAPDH* expression. The primer list is shown in Appendix Table S4. Data are from two independent experiments and represent the average.

### Appendix Figure S2. siRNA-based screen in HeLa cells to discover MT-binding protein(s) potentially involved in the Wnt/PCP signaling pathway.

A. Primary screening by cell spreading assays using siRNA pools for the indicated genes. Data represent the percentage of blebbing cells 60 min after being replated on a fibronectin-coated glass-bottom dish (total number of blebbing cells divided by total cell number, from four independent experiments). The siRNA list is shown in Appendix Table S5.

B. Wound healing assay using siRNA pools for the indicated genes. Data are from four independent experiments and represent the average distance moved by the wounded edge 6 h after wounding,  $\pm$  S.D.

C. RT-qPCR analysis for the depletion efficiency of the indicated siRNAs. At 72 h post-transfection with control or the indicated siRNAs, the mRNA level of each gene was quantified and normalized to the *GAPDH* expression. The mRNA level relative to that of control cells is shown. Data are from three independent experiments and represent the average  $\pm$  S.D.

D. Wound healing assay of cells transfected with each validated siRNA individually. Data are from three independent experiments and represent the average distance moved by the wounded edge 6 h after wounding,  $\pm$  S.D.

### Appendix Figure S3. Map7 and its paralog, Map7D1 belong to the MAP7 family.

A. Schematic structures of MAP7 family proteins (left). Expression levels of MAP7 family genes in HeLa cells. The mRNA level of each gene normalized to the *GAPDH* expression is shown.

B. Specificity of anti-Map7D1 antibodies was evaluated by immunoblotting. HeLa cells were transfected with the indicated siRNAs. To detect Map7D1 alone, we used antibody #1, which hardly recognized Map7. Because antibody #2 recognized both Map7D1 and Map7, we used #2 to detect both of these proteins.

C. Specificity of siRNAs against Map7, Map7D1, or Map7D3. At 72 h post-transfection with control or the indicated siRNAs, cells were lysed, and the expression levels of *MAP7*, *MAP7D1*, and *MAP7D3* were quantified by normalization to the *GAPDH* expression. Relative mRNA levels to control cells are shown. In addition, specificity of siRNAs against Map7 or Map7D1 was confirmed by immunoblotting (the right of the bottom panel). The double depletion of Map7 and Map7D1 was achieved by transfecting cells with a mixture of three validated siRNAs against Map7 and the two against Map7D1.

D. Subcellular localization of endogenous Map7 or Map7D1 in non-migrating HeLa cells. To see the co-localization of MTs, fixed cells were co-immunostained for  $\alpha$ -tubulin. Scale bars, 10  $\mu$ m.

Data information: Data are from three independent experiments and represent the average  $\pm$  S.D in A and C.

#### **Appendix Figure S4. Generation of Map7-EGFP knock-in HeLa cells.**

A. Schematic representation of the strategy to generate Map7-EGFP knock-in (Map7-EGFP<sup>KI</sup>) HeLa cells by the CRISPR-Cas9 technique (left). The knock-in (KI) was confirmed by PCR using genomic DNAs derived from parental HeLa cells (WT) or Map7-EGFP<sup>KI</sup> HeLa cells (KI) as a template. The positions of primer sets detecting the control (1) or KI (2) allele are shown at the right panel.

B. An image of the Map7-EGFP<sup>KI</sup> localization in living cells (see Movie EV1). Scale bars, 10  $\mu$ m.

#### **Appendix Figure S5. Phenotypes of Map7/7D1-depleted HeLa cells.**

A. Control and Map7/7D1-depleted migrating cells stained for acetylated-tubulin. Cells were fixed 1 h after wounding, and stained with anti- $\alpha$ -tubulin (green) and anti-acetylated-tubulin (red) antibodies.

B. Peripheral MTs in the indicated cells during cell adhesion. Cells were fixed 1 h after being replated on fibronectin-coated cover glass, and stained with an anti- $\alpha$ -tubulin antibody and Phalloidin. Map7D/7D1 depletion caused a decrease in the proportion of cells with polarized MT arrays that were induced by cell adhesion. Cells with Map7/7D1-depletion failed to form lamellipodia (arrow), and instead exhibited membrane blebbing (arrowheads). Graph shows the percentage of cells with polarized MT arrays.

C. Kinetics of FA turnover during cell adhesion was evaluated in the indicated cells by measuring the cell adhesion-dependent activation of FAK. Cells were lysed 1 h after being replated on a fibronectin-coated dish. Map7/7D1-depleted cells exhibited decreased auto-phosphorylation of FAK on Tyr397 (pY397) and FAK-dependent phosphorylation of Paxillin on Tyr118 (pY118) during cell adhesion.

D. Image of multinucleated cells induced by depleting Map7/7D1. Cells were stained with DAPI (DNA) and an anti- $\alpha$ -tubulin antibody. Graph shows the percentage of multinucleated cells in the indicated cell types.

E. The Wnt3a-induced expression of *AXIN2* in the indicated cells. Cells were lysed 8 h after addition of buffer or purified Wnt3a (20 ng/ml). Expression level of *AXIN2* transcripts was quantified by normalization to the *GAPDH* expression at the top panel. Depletion efficiency of Map7/7D1 was shown at the bottom panel.

Data information: Scale bars, 10  $\mu$ m in A, B, and D. Data are from three independent experiments and represent the average  $\pm$  S.D in B, D, and E. Statistical significance was tested with the Student's *t*-test in B and D.

**Appendix Figure S6. Specific complex formation between Map7/7D1 and Dvl.**

A. Lysates from HeLa cells co-expressing hMap7-EGFP or mMap7D1-EGFP with mDvl2-V5His<sub>6</sub> were immunoprecipitated with an anti-V5 antibody, and the immunoprecipitates were probed with anti-GFP and anti-V5 antibodies.

B. Lysates from HeLa cells co-expressing hMap7-EGFP or rat (r) Map7D2-EGFP with mDvl2-V5His<sub>6</sub> were immunoprecipitated with an anti-V5 antibody, and the immunoprecipitates were probed with anti-GFP and anti-V5 antibodies.

C. The phosphorylation state of the indicated Dvl2 mutants. Lysates from HeLa cells expressing various mutants of mDvl2-EGFP were immunoprecipitated with an anti-GFP antibody, and the immunoprecipitates were treated with (+) or without (-) alkaline phosphatase (CIAP).

D. The amount of MBP-hMap7<sup>1-265ΔCC1</sup> was determined on SDS polyacrylamide gels with Coomassie brilliant blue staining. Arrow shows the intact MBP-hMap7<sup>1-265ΔCC1</sup>.

E. Lysates from HeLa cells were subjected to immunoprecipitation with control IgG or an anti-APC antibody, and analyzed by immunoblotting with an anti-Map7/7D1 or anti-APC antibody.

### **Appendix Figure S7. Generation of Dvl2-EGFP knock-in HeLa cells.**

A. Schematic representation of Dvl2-EGFP knock-in (Dvl2-EGFP<sup>KI</sup>) HeLa cell generation by the CRISPR-Cas9 technique. The KI was confirmed by PCR using genomic DNA derived from parental HeLa cells (WT) or Dvl2-EGFP<sup>KI</sup> HeLa cells (KI) as a template (right panel). The positions of the primer sets for detecting the control (1) or KI (2) allele are shown at the bottom of the left panel.

B. Dvl2-EGFP<sup>KI</sup> expression was confirmed by immunoblotting. Lysates derived from the indicated cells were probed with anti-Dvl2 (left panel) and anti-GFP (right panel) antibodies. The number of KI events on the pseudo-triploid HeLa genome was estimated by comparing the band intensity of Dvl2 with that of Dvl2-EGFP<sup>KI</sup>. In this experiment, a cell strain in which EGFP was inserted into two of the three *Dvl2* loci was used.

C. Localization patterns of Dvl2-EGFP<sup>KI</sup> in three independent clones. The same localization pattern was seen in all of the clones. Scale bars, 10 μm.



**Appendix Figure S8. Wnt5a signaling and the Kinesin-1 member Kif5b promote directional Map7 movement toward the MT plus-end.**

A. Graph shows fitted curves from the indicated data sets, related to Fig. 7.

B. FRAP analysis of Map7-EGFP<sup>KI</sup> at the leading edge of the indicated cells after wounding. Cropped images of Map7-EGFP<sup>KI</sup> at the leading edge of the indicated cells after wounding, related to Fig. 7B.

C. Confirmation of the depletion efficiency of si*KIF5B*. Lysates derived from the indicated cells were separated by SDS-PAGE, and immunoblotted for Kif5b, Map7/7D1, and Dvl2. Kif5b depletion did not affect the expression of Map7/7D1 or Dvl. The blot was reprobbed for  $\gamma$ -tubulin as a loading control.

**Appendix Figure S9. Generation of Ens::EGFP knock-in fly strains.**

A. Schematic representation of the generation of an Ens::EGFP knock-in (Ens::EGFP<sup>KI</sup>) fly by the CRISPR-Cas9 technique.

B. Images of Ens::EGFP<sup>KI</sup> egg chambers. Egg chambers were counterstained with DAPI (DNA). Enlarged image shows the Ens::EGFP<sup>KI</sup> localization to the apical region in the follicle cell epithelium.

C. Single channel images for live pupal wings in Ens::EGFP<sup>KI</sup> pupae expressing DE-Cadherin::mTomato at 29 and 30 h APF. P, proximal side; D, distal side.

Data information: Scale bars, 10  $\mu$ m in B and D

**Appendix Figure S10. Generation of *ens* null mutants.**

A. Lethality of different *ens* mutants. A few *ens*<sup>KO</sup> *neoFRT80B/Df(3L)ens*<sup>A3277</sup> hemizygous escapers were eclosed, all of which died immediately after eclosion. In addition, *ens*<sup>KO</sup> *neoFRT80B/ens*<sup>KO</sup>

*neoFRT80B* homozygous or transheterozygous mutants died before eclosion. In contrast, *ens<sup>AC</sup> neoFRT80B/Df(3L)ens<sup>A3277</sup>* hemizygous mutants survived up to two weeks after eclosion, and increased numbers of *ens<sup>AC</sup> neoFRT80B/ens<sup>AC</sup> neoFRT80B* homozygous mutants were eclosed, suggesting that the remaining N-terminal portion encoded by the *ens<sup>AC</sup>* allele allowed the organisms to grow to the adult stage.

B. Schematic representation of the generation of *ens* null mutants by the CRISPR-Cas9 technique. The deletions in the two *ens* null alleles are shown.

C. Pupal wings of *ens<sup>KO36</sup>/ens<sup>KO39</sup>* mutants at 32-34 h APF were stained with an anti-Fmi antibody and Phalloidin. P, proximal side; D, distal side. High magnification views of boxed area (intervein region between L3 and L4 veins) are shown at right. Magenta lines in right side panels indicate wing hair orientation. Because *ens<sup>KO36</sup>/ens<sup>KO39</sup>* mutants died before eclosion, we obtained their pupae by selecting third instar larvae, which were identified by the loss of GFP fluorescence from the balancer chromosome. Note that defects in wing hair orientation in *ens<sup>KO36</sup>/ens<sup>KO39</sup>* pupae were virtually identical to those in wing hair orientation in *ens<sup>KO36</sup>/Df(3L)BSC735* pupae. Therefore, off-target mutations in *ens<sup>KO36</sup>* or *ens<sup>KO39</sup>* chromosomes should not affect planar cell polarity on wing epithelium. Scale bar, 10  $\mu$ m.

D. Proposed model for the actions of Map7/7D1 in Wnt5a signaling. See Discussion in detail.

**Appendix Table S1. Primary antibodies used in this study.**

| Company                   | Name, catalog number                          | Used for (dilutions)                          |
|---------------------------|-----------------------------------------------|-----------------------------------------------|
| Absea                     | Rat anti-APC (KT45), 030903E07                | IF (1:200)                                    |
| Bioresource               | Rabbit anti-FAK pY397, 44-624G                | IB (1:3000)                                   |
| BD Biosciences            | Mouse anti-Clathrin heavy chain, 610500       | IB (1:5000)                                   |
|                           | Mouse anti-FAK, 610088                        | IB (1:3000), IF (1:250)                       |
|                           | Mouse anti-EB1, 610535                        | IF (1/500)                                    |
|                           | Mouse anti-Paxillin, 610052                   | IB (1:3000), IF (1:250)                       |
| Chromotek                 | Rat anti-RFP, 6g6-100                         | IF (1:200)                                    |
| Cell Signaling Technology | Rabbit anti-Dvl2, 3216                        | IB (1:3000), IP                               |
|                           | Rabbit anti-Paxillin pY118, 2541              | IB (1:3000)                                   |
|                           | Rabbit anti-Wnt5a/b, 2530                     | IB (1:1500)                                   |
| DSHB*                     | Mouse anti-Fmi, #74                           | IF (1:20)                                     |
|                           | Rabbit anti-Kinesin (Kif5b), GTX104874        | IB (1:3000)                                   |
| GeneTex                   | Mouse anti-GFP, M048-3                        | IB (1:2000)                                   |
|                           | Mouse anti-MBP, M091-3                        | IB (1:3000)                                   |
| MBL                       | Rabbit anti-GFP, 598                          | IB (1:5000), IF (HeLa, 1:500; Fly, 1:200), IP |
|                           | Rabbit anti-GST, PM013                        | IB (1:3000)                                   |
|                           | Rabbit anti-Detyrosinated tubulin, AB3201     | IB (1:3000)                                   |
|                           | Mouse anti-V5, 04434-36                       | IB (1:3000), IP                               |
| Nacalai                   | Rat anti-GFP, 04404-84                        | IF (HeLa, 1:500)                              |
|                           | Goat anti-Fz6, AF1526                         | IF (1:100)                                    |
| R&D systems               | Rabbit anti-APC (C-20), sc-896                | IB (1:1500), IP                               |
| Santa Cruz Biotechnology  | Mouse anti-Acetylated tubulin, T7451          | IB (1:5000), IF (1:500)                       |
|                           | Mouse anti- $\alpha$ -tubulin (DM1A), T6199   | IF (1:1000)                                   |
|                           | Mouse anti- $\beta$ -tubulin, T0198           | IB (1:5000)                                   |
|                           | Mouse anti- $\gamma$ -tubulin (GTU-88), T6557 | IB (1:5000)                                   |
|                           | Rabbit anti-Flag, F7425                       | IF (1:500)                                    |
|                           | Rabbit anti-Map7, SAB1408648                  | IB (1:3000), IF (1:250)                       |
|                           | Rabbit anti-Map7D1#1                          | IB (1:5000), IF (1:500)                       |
| Sigma-Aldrich             | Mouse anti- $\alpha$ -tubulin (DM1A), T6199   | IF (1:1000)                                   |
|                           | Mouse anti- $\beta$ -tubulin, T0198           | IB (1:5000)                                   |
| T. Fujimori's lab         | Mouse anti- $\gamma$ -tubulin (GTU-88), T6557 | IB (1:5000)                                   |
|                           | Rabbit anti-Map7, SAB1408648                  | IB (1:3000), IF (1:250)                       |
|                           | Rabbit anti-Map7D1#1                          | IB (1:5000), IF (1:500)                       |
| Made in-house             | Guinea pig anti-Celsr1 [1]                    | IF (1/100)                                    |
|                           | Rat anti-E-cadherin [2]                       | IF (1/2)                                      |
| Made in-house             | Rabbit anti-Map7D1#1                          | IB (1:5000), IF (1:500)                       |
|                           | Rabbit anti-Map7D1#2                          | IB (1:5000)                                   |

IB, Immunoblotting; IF, Immunofluorescence; IP, Immunoprecipitation

\*, The Developmental Studies Hybridoma Bank

**Appendix Table S2. siRNAs used in this study except for the siRNA-based screen.**

| Name                   | Sequence (sense)            |
|------------------------|-----------------------------|
| Randomized control [3] | 5'-CAGUCGCGUUUGCGACUGGTT-3' |
| <i>MAP7</i> 3' UTR-1   | 5'-AUUAAUUGUAGAAAUUCUCAU-3' |
| <i>MAP7</i> 3' UTR-2   | 5'-UAUUUGAUUAGUUUAUCUGGA-3' |
| <i>DVL1</i> [3]        | 5'-GGAGGAGAUCUUUGAUGACTT-3' |
| <i>DVL2</i> [3]        | 5'-GGAAGAAAUUUCAGAUGACTT-3' |
| <i>DVL3</i> [3]        | 5'-GGAGGAGAUCUCGGAUGACTT-3' |
| <i>WNT5A</i> [3]       | 5'-GUUCAGAUGUCAGAAGUAUTT-3' |
| <i>APC</i> [3]         | 5'-GAGCGGCAGAAUGAAGGUCAA-3' |
| <i>KIF5B-1</i> [4]     | 5'-GCAAGAAGUAGAUCGCAUATT-3' |
| <i>KIF5B-2</i> [4]     | 5'-GCUGUCAAUUAUGAUCAGATT-3' |
| <i>KIF5B-3</i> [4]     | 5'-GACAUGUAGCAGUUACAAATT-3' |

**Appendix Table S3. sgRNA sequences used in this study.**

| Name             | Sequence (sense)            |
|------------------|-----------------------------|
| <i>MAP7_KI-1</i> | 5'-G TTCAGACACAGCAGACTGC-3' |
| <i>MAP7_KI-2</i> | 5'-G TTGACTGTGTTTGGCACAC-3' |
| <i>DVL2_KI-1</i> | 5'-CAATCCCAGCGAGTTCTTTG-3'  |
| <i>DVL2_KI-2</i> | 5'-GTGCTTGCTCTTACAGTGCC-3'  |
| <i>ens_KO-1</i>  | 5'-GCGAGTCTTGGGGGCCAACA-3'  |
| <i>ens_KO-2</i>  | 5'-GGACCTCCGCTGACCCCAA-3'   |
| <i>ens_KI-1</i>  | 5'-ACTATCAGCAGTGACTAGCG-3'  |
| <i>ens_KI-2</i>  | 5'-ACGATCCCCGATCTCTGAGG-3'  |

**Appendix Table S4. Primer sequences for RT-qPCR used in this study.**

| Primer name | Sequences                      |
|-------------|--------------------------------|
| C2orf55+    | TCCCGGATGAGGAGAAGG             |
| C2orf55-    | GTGTTTCAGGCAGCTCTTG            |
| KIAA1211+   | CAGTCCAGCACGCCCTA              |
| KIAA1211-   | CGTGCTTCTTCTCCTCCAA            |
| C6orf174+   | ACTGAGGCAACAGCTCATA            |
| C6orf174-   | TCATTGTCCTCCTCTGTGG            |
| CCDC165+    | TGAAACACTGGCGGCAA              |
| CCDC165-    | CCCACTGGAAAGCCACA              |
| SOGA1+      | CTAAGGAGATTCTTCTGGCAA          |
| SOGA1-      | CATTGTCTTCAGCTCGGTA            |
| CCDC9+      | CCCTGGAGGAGTCTGAG              |
| CCDC9-      | TGCTTCCAGCGCAGGTA              |
| C15orf52+   | AGGAGCCACCAGAAACT              |
| C15orf52-   | TCCTTCATATCCCACCTTCG           |
| CCDC38+     | TCCTCAGGGAGTATATGAAATATGG      |
| CCDC38-     | GATGCCTTCTTGTACTTGAAT          |
| CCDC37+     | TTGAAGACACTCTGAAGCATTAC        |
| CCDC37-     | CTGGTGTGGAGTTAACTG             |
| FAM81B+     | CGGCCACAGGAACTAAC              |
| FAM81B-     | TCTCAATTTGCCGGTGC              |
| FAM81A+     | TTGAACAAAGAACAGCAGGC           |
| FAM81A-     | TGGTGGTTACTGTCTCTGTGA          |
| FAM164A+    | GGATCTTCACGATTACCGC            |
| FAM164A-    | GTGGTGTGGAATTTCCGGG            |
| FAM164B+    | CGATCAGCAAAGCAGTGT             |
| FAM164B-    | TGCAGAAATTAGTATGTCGCTC         |
| FAM164C+    | CAGAAGGATCCAGACGC              |
| FAM164C-    | ATCCTCTCTCCTGTCTCTACTAA        |
| G3BP2+      | ACCAGAAGTTCAATCTCAGC           |
| G3BP2-      | TGATGACTATCTGGATAGCGAATTA      |
| G3BP1+      | GTGGAGCTGTTCCAGTTAC            |
| G3BP1-      | GGGAGGAATATTTATTCGTTGTTCT      |
| GCOM1+      | AGCCTAGAGGAGAAAGACC            |
| GCOM1-      | CTGATACCTTTCCTTGTCAGAAT        |
| CCDC68+     | TCTTAGAAATGAACAAAGAGAATGAAGTAT |
| CCDC68-     | ACCTGGAGTAATTGTTTACTGTC        |
| TUFT1+      | GATGGAGACGGAGCATCA             |
| TUFT1-      | GTGGATCTTCTCCCGCA              |
| LRR40+      | TACGGTCCTTGAAAGGC              |
| LRR40-      | AGGACTTCTTGTGTTCTTTAC          |
| LRR30+      | CGAGGTCCAGAACTCAATC            |
| LRR30-      | CAGGCAGTTCATGTTGACAAA          |
| LRRD1+      | GTGCAATGTTGGAATGCC             |
| LRRD1-      | ATATGTTATTAAGATGTGAGATACAGTCAG |

|             |                           |
|-------------|---------------------------|
| LRR1Q4+     | TGACCTGGACGAGAACAAA       |
| LRR1Q4-     | GGAGGAGGTTGTGGGATAA       |
| LRR45+      | GCAGAGCGGGAGTCTAA         |
| LRR45-      | GCTGACATGCTGGTCATC        |
| C14orf166B+ | CTTCAAGGAAGACTCCGCA       |
| C14orf166B- | GCTCAGATCCAGTGACG         |
| TCTE1+      | CAGCGAGGGAGAGATGG         |
| TCTE1-      | AAGGAGAGGCAGTCACG         |
| PSD3+       | TATACGGAGGACTCCACCGA      |
| PSD3-       | AATGCGCTGTTGTATCATTG      |
| PSD+        | TCCCTGCCACTCAGAGGA        |
| PSD-        | TGCCATTGGACAAGGT          |
| PSD2+       | GGGTCCTCACACACTTCTC       |
| PSD2-       | ATTGCTGACAGGACATCTTT      |
| PSD4+       | AGCTTCTTCTCCAGAGCCTA      |
| PSD4-       | AGTGAAGACTGTGAAGCATCTA    |
| RASAL3+     | GCTTCTACTGAGGACTGTGA      |
| RASAL3-     | AGCTTGAGAACACGATGC        |
| DAB2IP+     | GCTGGAGCAGAGCATAG         |
| DAB2IP-     | ATCGTTCTCAATCACCATCTT     |
| RASA1+      | GTTCTGTCTATGTCGTTTCATGAT  |
| RASA1-      | AAATGCCTGCAGACCTT         |
| RASAL2+     | GTTTCCCAACTTGATAAGGGT     |
| RASAL2-     | GGACTGGAGTTATGTTTCAGTG    |
| SYNGAP1+    | CATCGCAGACAGGCTTATC       |
| SYNGAP1-    | AAGTCCTCCTTTGAGGTAAC      |
| SPATS2+     | GCAGAATGGTGTCTCTGAT       |
| SPATS2-     | TTTACTGGTGGCGAGGG         |
| SPATS2L+    | AATTAAGCACTTTGTCAGCGA     |
| SPATS2L-    | CAGGGAGTTCTTGAGGAATAG     |
| ZBTB47+     | AGAAGAGGAAGAGGAAGGT       |
| ZBTB47-     | TGATCCTGCTCACTAGGC        |
| ZNF652+     | CTAAGCGTAAGAAGCGGG        |
| ZNF652-     | CAAATCTGCATGCGCCTA        |
| MAP7D1+     | GGACAAGGAGCGGGAAA         |
| MAP7D1-     | TGTGGAGGGAGAGGATGG        |
| MAP7+       | AACTCTTTGTAACACCACCT      |
| MAP7-       | GGTTGTCTTGCTTTGGGA        |
| MAP7D2+     | GGCATTCTAAGAGACCATC       |
| MAP7D2-     | CTTTCCTCTTGGGCATGT        |
| MAP7D3+     | CAAGTGTGGATGCACCC         |
| MAP7D3-     | TCCATGCTCATCTCAGAATCA     |
| ANKLE2+     | GTAAGTTTGGAAATGCAGATGTAG  |
| ANKLE2-     | CCTTTAAATACTCTCTGATCCGC   |
| C1orf49+    | TAAACAAGAAGGGCGGTTTAC     |
| C1orf49-    | TTCCTTCATAATTTCCACAAATTCG |
| C2orf16+    | ACTATGGAAAGGAAGCTTTGT     |

|               |                               |
|---------------|-------------------------------|
| C2orf16-      | GGCTGAGAAATAGTAACTGGAC        |
| C5orf49+      | TCAGAAGTTGCACCGAGAT           |
| C5orf49-      | GCCAAAGTCCCGGTTTAG            |
| C6orf97+      | AAATCGCAGCCCTCCTTA            |
| C6orf97-      | TCCTTTCCCAACTGTTCAACAA        |
| C10orf68+     | GCAGTTAAAGAGAAAGAGTTACCC      |
| C10orf68-     | GGTTGACTCCTTCATTAGACC         |
| C10orf118+    | AAGGAAGGCGAAACGACTA           |
| C10orf118-    | TGTTGTTTCTTTGAGTTTATCTTTGG    |
| C16orf45+     | CAGAACTTGGTCGCCAT             |
| C16orf45-     | TTGTCTTCTTCTTGCTCCCT          |
| CCDC13+       | TTGTCTGTCTATCCAGACCC          |
| CCDC13-       | GTTCCGAGACCTCATGC             |
| CCDC40+       | CCATCATGAAGGAGGAAGAAA         |
| CCDC40-       | TGCAGGGTGAGCCTGTA             |
| CCDC67+       | ACTTGAATCATCTTATTTGCCTTCTATTA |
| CCDC67-       | GATGAAGCTCTTCTGTTAGGTC        |
| CCDC83+       | CCAGGTATCCAGTGCTACA           |
| CCDC83-       | GCAATTCCAAAGACATTTCTTCAG      |
| CCDC146+      | GCTAAGAGGAATTTGGCCC           |
| CCDC146-      | CTTTCATTTCTTTAACAATGTTGGTGTA  |
| CCDC147+      | TCGAACAGCACAAAGAAACC          |
| CCDC147-      | CCGCCTTAAGCATGTTCTTAT         |
| CEP112+       | AACATGAAACTGTTACAAACCAAATA    |
| CEP112-       | GCTTTCTTTGAAGTTCTGATTCC       |
| CEP128+       | CTGTATGCAGCATTACAACAAATAG     |
| CEP128-       | AATTCTTAACTTCCAATTCAAGGTC     |
| CNTLN+        | TGTGGAATGAACTGGCATATTT        |
| CNTLN-        | GCTGTTCTTCTTCTCTCTG           |
| CXorf58+      | AGTCCAAAGTAACTGATATAATGGAT    |
| CXorf58-      | ACATTAGCATTGTCCTGGG           |
| FHAD1+        | ACAGAGTGAAGGAAGCATTAG         |
| FHAD1-        | GGGTAAATGGTTCTCCAGAT          |
| FSIP1+        | ATGAACTTGCAGTCACCC            |
| FSIP1-        | CCATATTTCTTTCACCATCACG        |
| LOC100271840+ | CTAATGAAGATGGAGTCCACG         |
| LOC100271840- | GATCAGCGATGCCCTTG             |
| LRRCC1+       | CCTTGTTGAACAGCTAGACC          |
| LRRCC1-       | ATTTCCTTTAGCCTATCTGTGG        |
| MIPOL1+       | AGCAGAAATTGGCTAAAGAAGATAA     |
| MIPOL1-       | TAACAGCTTCATCACGTTCTT         |
| RGSL1+        | ACATGAAGGAAATGGACTATAGG       |
| RGSL1-        | GCCATCTTTGGGTTCTTGT           |
| ZNF626+       | CAAAGCCTTTAACCACTCTTG         |
| ZNF626-       | TAGGGTTTCTCTCCAGTATGATT       |
| ZNHIT6+       | GGAATTGATGCATGGAGAGT          |
| ZNHIT6-       | GCTTCTTCTGTACCACAAGT          |

---

---

|        |                      |
|--------|----------------------|
| GAPDH+ | CCTGTTGACAGTCAGCCG   |
| GAPDH- | CGACCAAATCCGTTGACTCC |

---



**Appendix Table S5. siRNA sequences for the siRNA-based screen used in this study.**

| NCBI gene symbol | siRNA Target Sequence  |
|------------------|------------------------|
| <i>G3BP1</i>     | AACCCTGGTTCCAACAGAATG  |
| <i>G3BP1</i>     | CAGGAGGAGTCTGAAGAAGAA  |
| <i>G3BP1</i>     | CAGAAAGAAATCCACAGGAAA  |
| <i>G3BP2</i>     | AAGAGCTGCAAGAGAGCGAGA  |
| <i>G3BP2</i>     | CAGGGATATTAGGCGCAATGA  |
| <i>G3BP2</i>     | CCACCTCGTGTGCGTGAACAA  |
| <i>C10orf118</i> | CAGCCTGTCATTGAATCTAAA  |
| <i>C10orf118</i> | AAGGAAATTATTAATCGCCAA  |
| <i>C10orf118</i> | ACACTACTTAACACTCCTAAA  |
| <i>CEP128</i>    | CAGGACCGTGTAAATTGCATTA |
| <i>CEP128</i>    | AACGAGCGTTGGAGAAACAAT  |
| <i>CEP128</i>    | CACAGGGTATTAAACGAATGA  |
| <i>ZNHIT6</i>    | CACCGTCTAGCCACAGGAGAA  |
| <i>ZNHIT6</i>    | CACGTTGTATGCGATATTCCT  |
| <i>ZNHIT6</i>    | CTCCTAAGTGATTATCGATTT  |
| <i>SOGA1</i>     | TTCCTATGCCTCTGAGATCAA  |
| <i>SOGA1</i>     | CACGCCCAATGAGTACATCAA  |
| <i>SOGA1</i>     | ACGCTGTTTGTGACTGTAGTA  |
| <i>ZC2HC1A</i>   | CCCGAAATTCCACACCACCTA  |
| <i>ZC2HC1A</i>   | AACAGGCAGCACGTATTAGTA  |
| <i>ZC2HC1A</i>   | TGCCATGAGTGTGGACTAAA   |
| <i>CNTLN</i>     | CACAGCTGAAAGTATATCATA  |
| <i>CNTLN</i>     | AAGGAGTGTGTACAGAACAAA  |
| <i>CNTLN</i>     | CTGCACTGACCTGCTAAATGA  |
| <i>FAM81A</i>    | ATCCGTCAGAAGTATGATGTA  |
| <i>FAM81A</i>    | ACAGCCGTCTATGAAAGCATA  |
| <i>FAM81A</i>    | AAGGCTCAATATCTGCGTTGA  |
| <i>ANKLE2</i>    | ATCGTCAAAGCCGGATTGAAA  |
| <i>ANKLE2</i>    | CCGTTACGTGGTGGACCTGTA  |
| <i>ANKLE2</i>    | AAGGAGCGGATCAGAGAGTAT  |
| <i>SOGA2</i>     | ACCCACGAGCTCAGCAAGTTT  |
| <i>SOGA2</i>     | CCGACTCCTCCTGGTACCTAA  |
| <i>SOGA2</i>     | CTGCAGTACCGTCTTCGGAAA  |
| <i>KIAA1211</i>  | CAGGATCCACAACATGAGCAA  |
| <i>KIAA1211</i>  | ACCATCGAAAGTGTCAACTTA  |
| <i>KIAA1211</i>  | CAGCCGCTGTGGATAACGTTA  |
| <i>SPATS2L</i>   | CACCGTTTCTCTAACTAGATA  |
| <i>SPATS2L</i>   | TAGATATCGCGTCATGATTAA  |
| <i>SPATS2L</i>   | AAGATCTATGCAGTTAGATCA  |
| <i>LRRC40</i>    | AAGATGATGGACCTAGCCAAA  |
| <i>LRRC40</i>    | AAGGAATTGCACGTAGGTGAA  |
| <i>LRRC40</i>    | CAACATCGTCACTTCTATTAA  |
| <i>LRRC45</i>    | CTTGATGGAGACTATIGATAA  |

|               |                       |
|---------------|-----------------------|
| <i>LRRC45</i> | CTCCGAAAGCCTGCGCATCAA |
| <i>LRRC45</i> | CCGCACTCACGTCCTCAGCAA |
| <i>TCTE1</i>  | CAAGACCCTCCTGGAATTTGA |
| <i>TCTE1</i>  | CCCACCGTTGACCACTACCAA |
| <i>TCTE1</i>  | CACAGCTCTCAAAGCCTTCAA |
| <i>MIPOL1</i> | ATGGGTAGCTATAAGGTTACA |
| <i>MIPOL1</i> | AACGGGATGCTGCCTTGTCTA |
| <i>MIPOL1</i> | CAGGGCAGAGATCAACGAATT |
| <i>PSD3</i>   | AAGCGTGAAGATCGTAGGATT |
| <i>PSD3</i>   | AAGGACGTGATGAGTACAAA  |
| <i>PSD3</i>   | CAGGGACTTCTGGATAGGCTA |
| <i>RASA1</i>  | CAGCTCCCATATAACCATTA  |
| <i>RASA1</i>  | ACGGACCTGTCCCGTGATTTA |
| <i>RASA1</i>  | CAGACCTAATAGGTTATTACA |
| <i>RASAL2</i> | CGGCGACTGGAGGAATATGAA |
| <i>RASAL2</i> | CTCGTGGGCTGCCTAAACTAA |
| <i>RASAL2</i> | AACCTTCGCAGGACAGTTCAA |
| <i>SPATS2</i> | TACGTGCAATAGTTCCTAATA |
| <i>SPATS2</i> | CACAGTGTCTCTTGACCGGTA |
| <i>SPATS2</i> | CGGTATCGAGTTGTAGTAAA  |
| <i>TUFT1</i>  | AAGTAGATAGGCATCAGAGTA |
| <i>TUFT1</i>  | CTGAGGTGGACACCTGTATAA |
| <i>TUFT1</i>  | CAGACGGAGCACGAGCACCTA |
| <i>ZNF652</i> | ACCAGCATTCTTAGGCGATAA |
| <i>ZNF652</i> | GCAGATCATAGTGGAGGTA   |
| <i>ZNF652</i> | AGAGTGAGCCTTTAAATCATA |
| <i>MAP7</i>   | CCTCTTCATCTGCAACTTT   |
| <i>MAP7</i>   | GGAGAGAAAGAAGCGACTT   |
| <i>MAP7</i>   | ATGAGAATTTCTACAATTA   |
| <i>MAP7D1</i> | AGCGTCTGGAGGAGATCAT   |
| <i>MAP7D1</i> | ATGAAGAGGACTCGGAAGT   |
| <i>MAP7D1</i> | CCAAGGGGCGGGTTCGGAG   |
| <i>MAP7D3</i> | AGCACTAACAGGCAAATCC   |
| <i>MAP7D3</i> | GCTTTGAGCCAAAGGCATA   |
| <i>MAP7D3</i> | GCCAATAAACGATCTGCAT   |

**Appendix Table S6. Fly strains used in this study.**

| Used in                        | Genotype                                                                                                       |
|--------------------------------|----------------------------------------------------------------------------------------------------------------|
| Fig. 8C and Appendix Fig. S9C  | <i>w; shg::mTomato; ens::EGFP<sup>K1</sup></i>                                                                 |
| Fig. 9A                        | <i>Oregon-R</i>                                                                                                |
| Fig. 9A                        | <i>w; Df(3L)BSC735/TM6B P{Dfd-EYFP}3 Sb Tb ca</i>                                                              |
| Fig. 9A and Appendix Fig. S10C | <i>w; ens<sup>KO36</sup> P{neoFRT}80B/TM6B P{Dfd-EYFP}3 Sb Tb ca</i>                                           |
| Fig. 9C and Fig. EV2           | <i>w; dsh::EGFP</i>                                                                                            |
| Fig. 9C and Fig. EV2           | <i>w; dsh::EGFP; ens<sup>KO36</sup> P{neoFRT}80B/TM3, P{sChFP}3 Sb</i>                                         |
| Fig. 9C and Fig. EV2           | <i>w; dsh::EGFP; ens<sup>KO39</sup> P{neoFRT}80B/TM3, P{sChFP}3 Sb</i>                                         |
| Appendix Fig. S9B              | <i>w; ens::EGFP<sup>K1</sup></i>                                                                               |
| Appendix Fig. S10A             | <i>w; ens<sup>KO36</sup> P{neoFRT}80B/TM3 Sb Ser</i>                                                           |
| Appendix Fig. S10A             | <i>w; ens<sup>KO39</sup> P{neoFRT}80B/TM3 Sb Ser</i>                                                           |
| Appendix Fig. S10A             | <i>w; ens<sup>ΔC</sup> P{neoFRT}80B/TM3 Sb Ser</i>                                                             |
| Appendix Fig. S10A             | <i>w; Df(3L)ens<sup>Δ3277</sup>, Chd64<sup>Δ3277</sup> ens<sup>Δ3277</sup> P{neoFRT}80B/TM3 Sb<sup>l</sup></i> |
| Appendix Fig. S10C             | <i>w; ens<sup>KO39</sup> P{neoFRT}80B/TM6B P{Dfd-EYFP}3 Sb Tb ca</i>                                           |

## Appendix References

1. Shi D, Komatsu K, Hirao M, Toyooka Y, Koyama H, Tissir F, Goffinet AM, Uemura T, Fujimori T (2014) Celsr1 is required for the generation of polarity at multiple levels of the mouse oviduct. *Development* **141**: 4558-4568.
2. Shirayoshi Y, Nose A, Iwasaki K, Takeichi M (1986) N-Linked Oligosaccharides Are Not Involved in the Function of a Cell-Cell Binding Glycoprotein E-Cadherin. *Cell Structure and Function* **11**: 245-252
3. Matsumoto S, Fumoto K, Okamoto T, Kaibuchi K, Kikuchi A (2010) Binding of APC and dishevelled mediates Wnt5a-regulated focal adhesion dynamics in migrating cells. *EMBO J* **29**: 1192-1204
4. Metzger T, Gache V, Xu M, Cadot B, Folker ES, Richardson BE, Gomes ER, Baylies MK (2012) MAP and kinesin-dependent nuclear positioning is required for skeletal muscle function. *Nature* **484**: 120-124
