# Supplementary material
Source: PubMed Central journal article supplement (PMC6030700)

Figure 9B

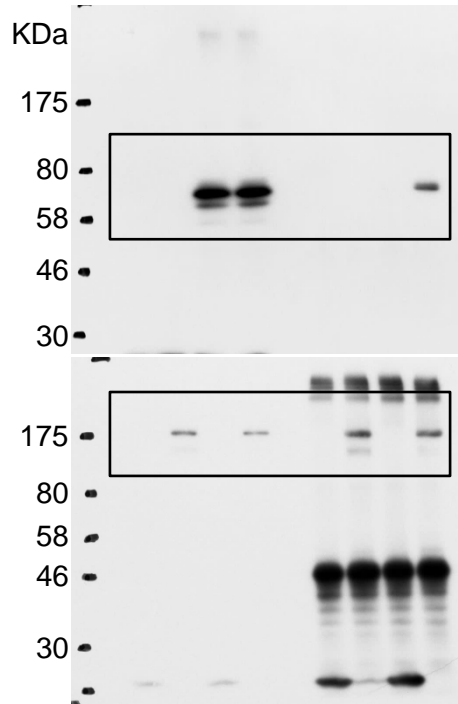

Supplement: EMBR-19-e45471-s023.pdf [file EMBR-19-e45471-s023.pdf]
